# Supplementary material for: Fine regulation of cellulose dissolution and regeneration by low pressure CO2 in DMSO/organic base: dissolution behavior and mechanism
Source: Royal Society of Chemistry journal article supplement (doi:10.1039/c6cp05541a), 2016-01-01
Supplement: c6cp05541a1.pdf [file c6cp05541a1.pdf]

Supporting Information for

# **Fine Regulation of the Cellulose Dissolution and Regeneration by Low Pressure CO<sub>2</sub> in DMSO/Organic Base: the Dissolution Behavior and Mechanism**

Jinfang Wang,<sup>a</sup> Zhimin Xue,<sup>b</sup> Chuanyu Yan,<sup>a</sup> Zhonghao Li,<sup>c</sup> and Tiancheng Mu<sup>a\*</sup>

\*Corresponding author. Email: [tcmu@ruc.edu.cn](mailto:tcmu@ruc.edu.cn)

## **Content:**

1. Solubility and thermodynamic parameters of MCC in CO<sub>2</sub>-DMSO/organic base solvent system: Figure S1, Tables S1, S2, and S3.
2. Solvatochromic parameters: Table S4 and Figure S2.
3. Error analysis: Tables S5 and S6.
4. Original ATR-FTIR spectrums and instruments photos for measuring ATR-FTIR spectrums: Figures S3 and S4.
5. Original NMR data: Figures S5 and S6.
6. UV-Vis spectrums and instruments photos for measuring UV-Vis spectrums: Figures S7 and S8.
7. Electrostatic potential (ESP) results: Figure S9.
8. Characterization and analysis of the regenerated cellulose: Figure S10.
9. Reusability/recyclability of the solvent system: Figure S11.

## 1. Solubility and thermodynamic parameters of MCC

The dissolved MCC solution, in which DMSO was replaced by d-DMSO, was syringed to an NMR tube under N<sub>2</sub> environment. Then CO<sub>2</sub> was sparged through the solution for 5 min, the tube was quickly capped and sealed. The CO<sub>2</sub> pressure was 1 atm at 303 K. Equilibrium constant ( $K_{eq}$ ) was calculated through the concentrations of species plus the pressure of CO<sub>2</sub>.<sup>1</sup>

**Table S1** Solubility of MCC in CO<sub>2</sub>-DMSO/DBU solvent system at different  $W_{DBU}$  (dissolving condition:  $P_{CO_2}$ = 1 atm; T=303 K; t=1 h)

| No. | $W_{DBU}$ | Solubility        | $K_{eq}$ |
|-----|-----------|-------------------|----------|
|     |           | (g/100 g solvent) |          |
| 1   | 0.05      | 5.7               | 0.54     |
| 2   | 0.1       | 9.0               | 0.42     |
| 3   | 0.2       | 8.6               | 0.20     |
| 4   | 0.3       | 8.1               | 0.13     |
| 5   | 0.4       | 7.5               | 0.09     |
| 6   | 0.5       | 5.5               | 0.05     |

### Rationale for the appearance of error bars for the solubility

1. As the water bath can't keep the temperature absolutely uniform, the slightly temperature change may cause the CO<sub>2</sub> pressure change in the high-pressure cell, which further influence the cellulose solubility.
2. While we try to reduce the stirring rate, there might be a very small amount of cellulose attached to the inner wall and can't participate dissolving. It will also affect the solubility.

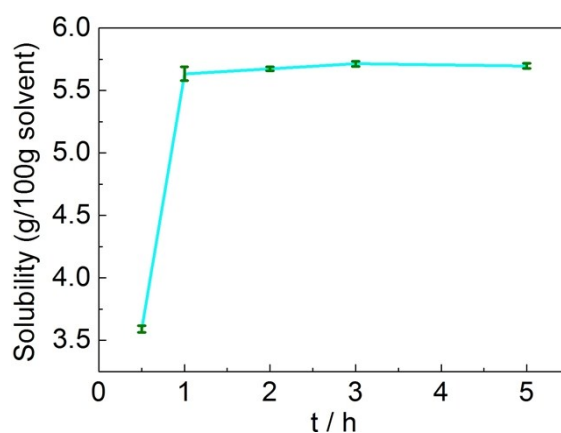

**Fig. S1** Effect of dissolving time on the solubility of MCC (dissolving condition:  $P_{CO_2}$ =0.1 MPa; T=303.15 K;  $W_{DBU}$ =0.1).

**Table S2** Solubility of MCC in CO<sub>2</sub>-DMSO/DBU solvent system at different temperature and pressure

| No. | Atmosphere      | Solubility (gram per 100 g of the solvent) |      |      |      |
|-----|-----------------|--------------------------------------------|------|------|------|
|     |                 | P / MPa                                    | 303K | 313K | 323K |
| 1   | CO <sub>2</sub> | 0.1                                        | 5.5  | 5.6  | 6.0  |
| 2   | CO <sub>2</sub> | 0.2                                        | 8.6  | 9.0  | 8.8  |
| 3   | CO <sub>2</sub> | 0.3                                        | 8.8  | 8.9  | 8.7  |
| 4   | CO <sub>2</sub> | 0.5                                        | 7.5  | 7.6  | 7.4  |
| 5   | CO <sub>2</sub> | 0.7                                        | 7.0  | 7.2  | 7.1  |
| 6   | CO <sub>2</sub> | 1.0                                        | 6.3  | 6.4  | 6.7  |

According to the solubility data of MCC, the standard Gibbs energy ( $\Delta G^\theta$ ) can be obtained by the following eqn:

$$\Delta G^\theta = -RT \ln K_{eq} \quad (1)$$

$$K_{eq} = \frac{[BaseH^+][ROCO_2^-]}{P_{CO_2}[Base][ROH]} \quad (2)$$

Where T stands for temperature;  $K_{eq}$  is the equilibrium constant and can be calculated based on the reported method.<sup>1</sup> The standard enthalpy ( $\Delta H^\theta$ ) may be obtained by eqn (3) according to the Van't Hoff equation and the standard entropy ( $\Delta S^\theta$ ) can be calculated by eqn (4).

$$\frac{d \ln K_{eq}}{d T} = \frac{\Delta H^\theta}{R T^2} \quad (3)$$

$$\Delta G^\theta = \Delta H^\theta - T \Delta S^\theta \quad (4)$$

All thermodynamic parameters calculated are listed in Tables S4. For CO<sub>2</sub>-DMSO/DBU solvent system,  $\Delta H^\theta$  values and  $\Delta S^\theta$  values are negative at almost whole temperature range, which indicates that the MCC dissolving process is enthalpy driven. The change of  $\Delta S^\theta$  values from positive to negative with the increase of CO<sub>2</sub> pressure means the dissolving process of MCC is entropy driven at low CO<sub>2</sub> pressure while it is different at high CO<sub>2</sub> pressure. The  $\Delta G^\theta$  values changed from negative to positive with increasing pressure. It means the interaction between MCC and organic base is thermodynamic favorable at low CO<sub>2</sub> pressure and thermodynamic unfavorable at relatively high CO<sub>2</sub> pressure. Moreover, it further suggests that the energy cost increased with the pressure increasing. Therefore, appropriate pressure is important for the dissolution of MCC in DMSO/DBU solvent system.

**Table S3** The Thermodynamic Parameters of MCC in the CO<sub>2</sub>-DMSO/DBU Solvent System at Different Temperature and Pressure

| parameters                                | T / K | P / MPa |         |         |         |         |         |
|-------------------------------------------|-------|---------|---------|---------|---------|---------|---------|
|                                           |       | 0.1     | 0.2     | 0.3     | 0.5     | 0.7     | 1.0     |
| $\Delta G^\theta$ (kJ mol <sup>-1</sup> ) | 303   | -3.89   | -1.01   | 0.07    | 0.95    | 1.63    | 2.28    |
|                                           | 313   | -1.18   | 1.87    | 2.89    | 3.81    | 4.55    | 5.15    |
|                                           | 323   | -1.03   | 1.86    | 2.92    | 3.86    | 4.65    | 5.46    |
| $\Delta H^\theta$ (kJ mol <sup>-1</sup> ) | 303   | -84.27  | -85.43  | -82.82  | -82.47  | -84.11  | -82.26  |
|                                           | 313   | -47.90  | -44.66  | -43.26  | -47.18  | -44.30  | -46.07  |
|                                           | 323   | -6.25   | 1.95    | 1.97    | -6.77   | 1.22    | -4.65   |
| $\Delta S^\theta$ (J mol <sup>-1</sup> )  | 303   | -265.16 | -278.47 | -273.41 | -275.19 | -282.81 | -278.84 |
|                                           | 313   | -149.19 | -148.58 | -147.38 | -162.84 | -155.99 | -163.58 |
|                                           | 323   | -16.17  | 0.28    | -2.95   | -32.90  | -10.64  | -31.30  |

## 2. Solvatochromic parameters

**Table S4** Solvatochromic Parameters in CO<sub>2</sub>-DMSO/DBU Solvent System at Different Temperature and Pressure

| Temperature | P / MPa | Kamlet – Taft parameters of the solvent system |         |       |                    |
|-------------|---------|------------------------------------------------|---------|-------|--------------------|
|             |         | A                                              | $\beta$ | $\pi$ | $\beta$ - $\alpha$ |
| 303 K       | 0.0     | 0.81                                           | 1.20    | 0.59  | 0.39               |
|             | 0.1     | 0.85                                           | 1.00    | 0.63  | 0.15               |
|             | 0.2     | 0.87                                           | 0.92    | 0.65  | 0.05               |
|             | 0.3     | 0.78                                           | 1.26    | 0.57  | 0.48               |
|             | 0.5     | 0.85                                           | 1.07    | 0.63  | 0.22               |
|             | 0.7     | 0.84                                           | 1.07    | 0.62  | 0.23               |
|             | 1.0     | 0.74                                           | 1.12    | 0.54  | 0.37               |
| 313 K       | 0.0     | 0.80                                           | 1.23    | 0.59  | 0.43               |
|             | 0.1     | 0.84                                           | 0.92    | 0.63  | 0.08               |
|             | 0.2     | 0.83                                           | 0.87    | 0.62  | 0.04               |
|             | 0.3     | 0.72                                           | 1.24    | 0.52  | 0.52               |
|             | 0.5     | 0.75                                           | 1.14    | 0.55  | 0.39               |

|       |     |      |      |      |      |
|-------|-----|------|------|------|------|
|       | 0.7 | 0.73 | 1.16 | 0.53 | 0.43 |
|       | 1.0 | 0.73 | 1.09 | 0.53 | 0.36 |
|       | 0.0 | 0.66 | 1.27 | 0.48 | 0.60 |
|       | 0.1 | 0.75 | 0.96 | 0.55 | 0.21 |
|       | 0.2 | 0.73 | 0.88 | 0.53 | 0.16 |
| 323 K | 0.3 | 0.72 | 1.14 | 0.52 | 0.42 |
|       | 0.5 | 0.73 | 1.13 | 0.54 | 0.40 |
|       | 0.7 | 0.72 | 1.05 | 0.53 | 0.32 |
|       | 1.0 | 0.71 | 1.07 | 0.51 | 0.36 |

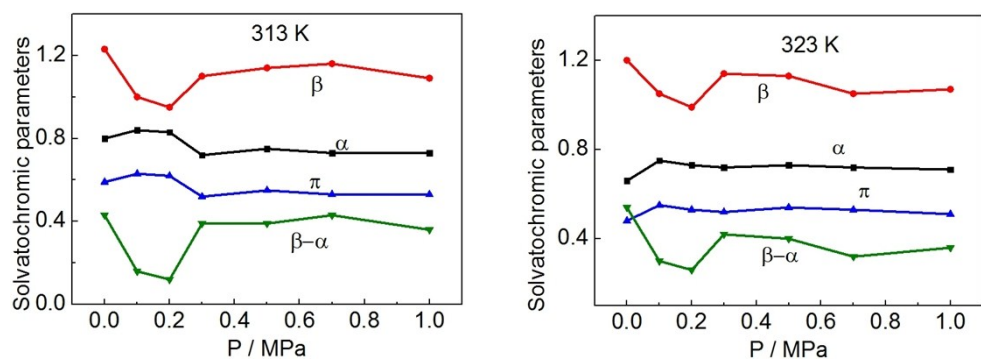

**Fig. S2** Solvatochromic parameters in CO<sub>2</sub>-DMSO/DBU solvent system at different temperature and pressure:

black is  $\alpha$ , red is  $\beta$ , blue is  $\pi$ , olive is  $\beta-\alpha$ .

### 3. Error analysis

Standard Deviation:

$$S = \sqrt{\frac{1}{N-1} \sum_{i=1}^N (X_i - \bar{X})^2}$$

**Table S5** Effect of  $W_{\text{DBU}}$  on the solubility of MCC (dissolving condition:  $P_{\text{CO}_2}=0.2$  MPa;  $T=323.15$  K; dissolving time: 1h).

| $W_{\text{DBU}}$ (%) | Solubility (gram per 100 g of the solvent) |      |      |      | Standard Deviation (S) |
|----------------------|--------------------------------------------|------|------|------|------------------------|
|                      | 1                                          | 2    | 3    | Mean |                        |
| 0.05                 | 5.70                                       | 5.50 | 5.60 | 5.60 | 0.10                   |
| 0.10                 | 9.00                                       | 8.80 | 9.10 | 8.97 | 0.15                   |
| 0.20                 | 8.60                                       | 9.00 | 8.70 | 8.77 | 0.21                   |
| 0.30                 | 8.10                                       | 8.00 | 8.15 | 8.08 | 0.08                   |
| 0.40                 | 7.50                                       | 7.30 | 7.40 | 7.40 | 0.10                   |
| 0.50                 | 5.50                                       | 5.40 | 5.50 | 5.47 | 0.06                   |

**Table S6** Effect of dissolving time on the solubility of MCC (dissolving condition:  $P_{\text{CO}_2}=0.1$  MPa;  $T=303.15$  K;  $W_{\text{DBU}}=0.1$ ).

| t (h) | Solubility (gram per 100 g of the solvent) |      |      |      | Standard Deviation (S) |
|-------|--------------------------------------------|------|------|------|------------------------|
|       | 1                                          | 2    | 3    | Mean |                        |
| 0.5   | 3.58                                       | 3.62 | 3.57 | 3.59 | 0.03                   |
| 1     | 5.63                                       | 5.69 | 5.58 | 5.63 | 0.06                   |
| 2     | 5.67                                       | 5.66 | 5.69 | 5.67 | 0.02                   |
| 3     | 5.69                                       | 5.72 | 5.75 | 5.71 | 0.02                   |
| 5     | 5.69                                       | 5.68 | 5.72 | 5.70 | 0.02                   |

#### 4. Original ATR-FTIR spectrums and instrument photos

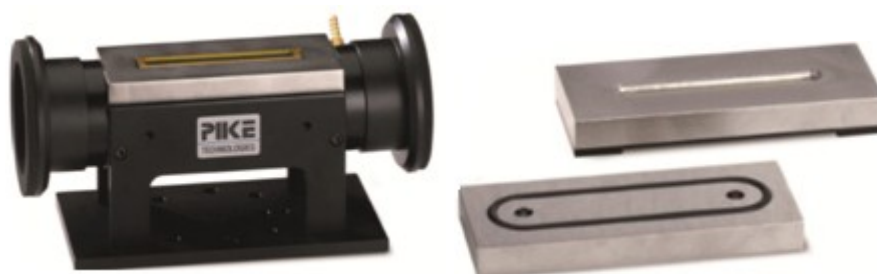

**Fig. S3** The photos of instrument for ATR-FTIR measurement

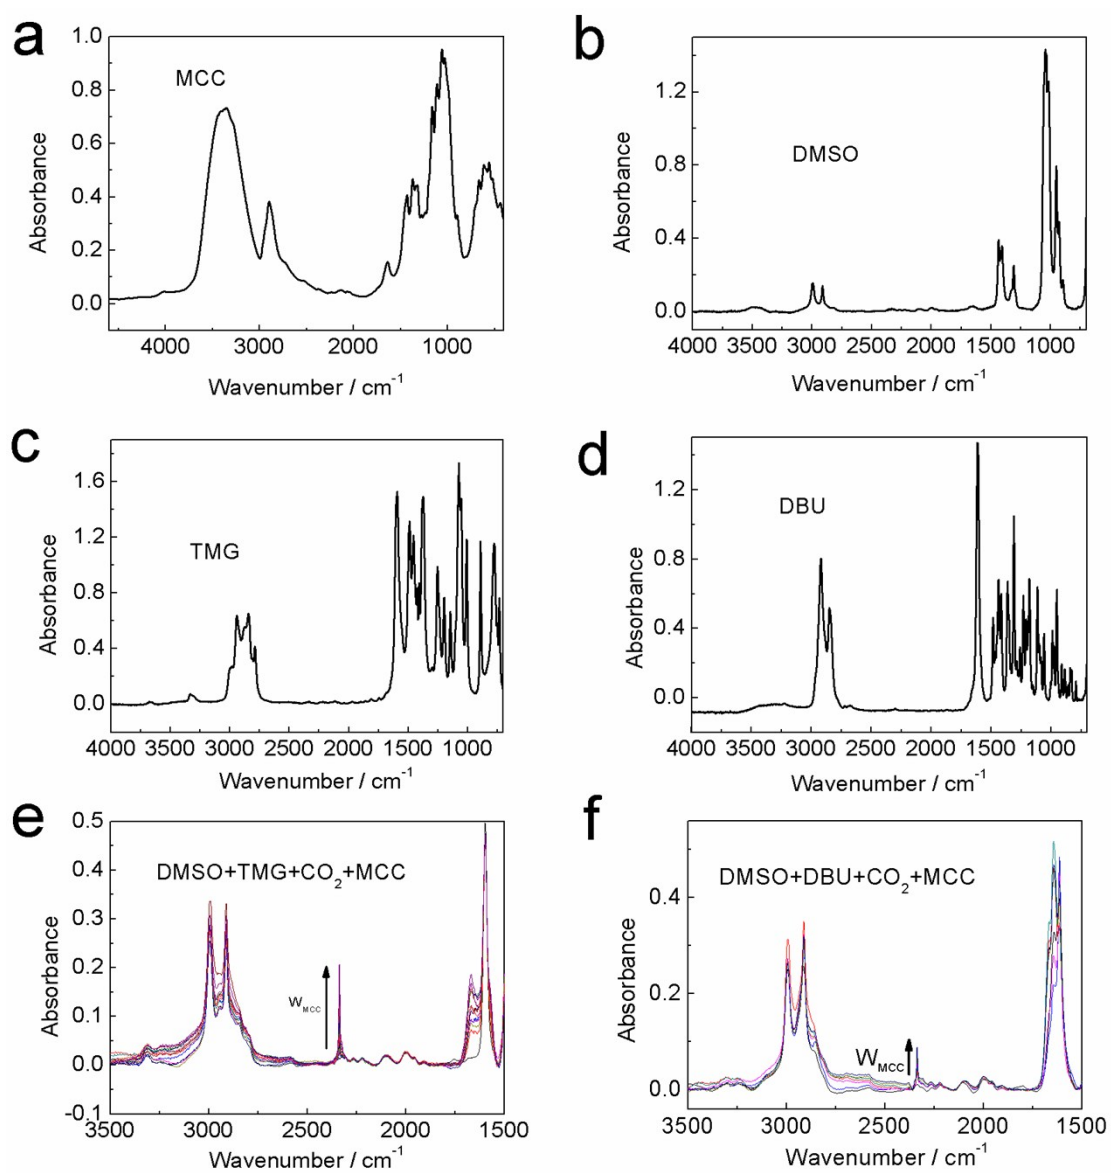

**Fig. S4** ATR-FTIR spectra of the formed solutions and their precursors: (a) MCC; (b) DMSO; (c) TMG; (d) DBU; (e) overlap spectra of different concentration MCC dissolving in CO<sub>2</sub>-DMSO/TMG solvent system; (f) overlap spectra of different concentration MCC dissolving in CO<sub>2</sub>-DMSO/DBU solvent system.

## 5. Original NMR data

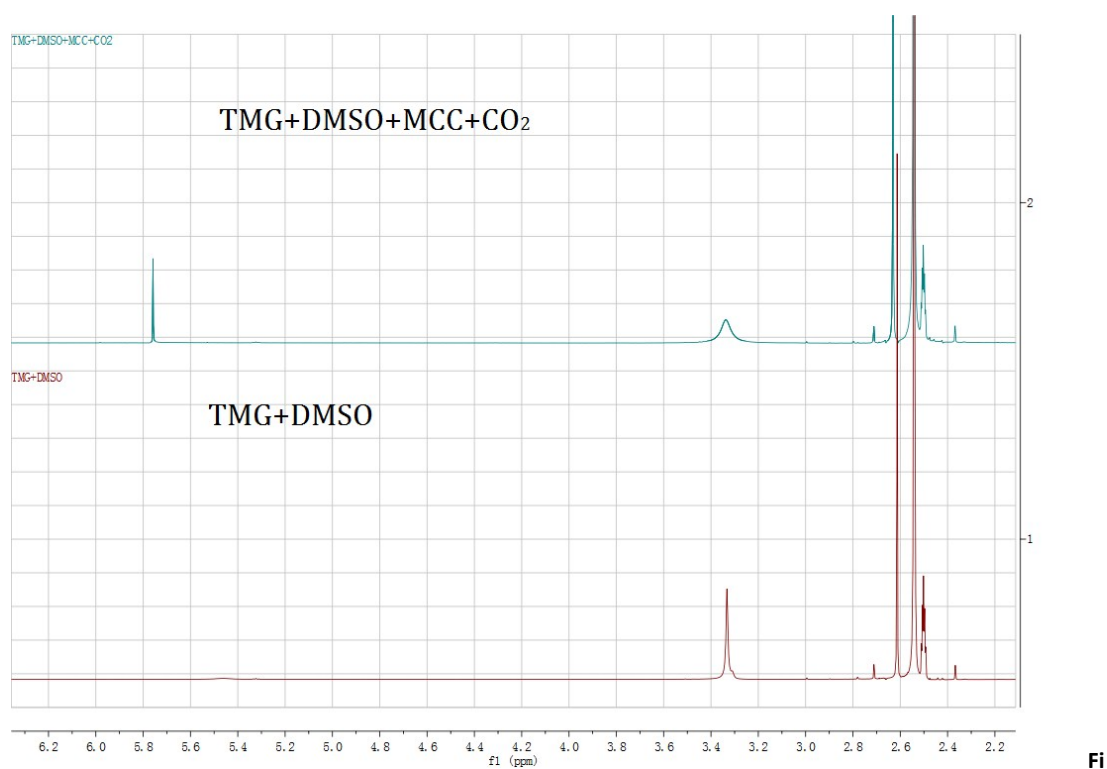

g. S5 Original NMR data of CO<sub>2</sub>-DMSO/TMG solvent system with and without MCC

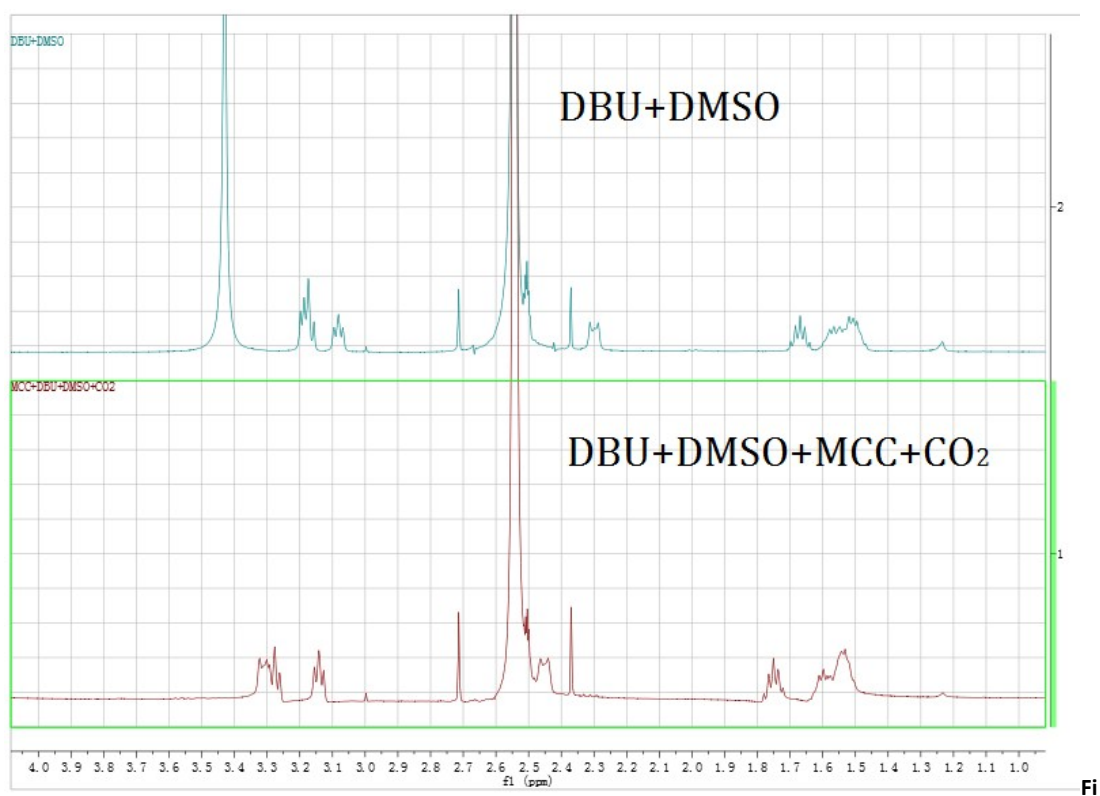

g. S6 Original NMR data of CO<sub>2</sub>-DMSO/DBU solvent system with and without MCC



## 6. Original UV-Vis spectrums and instrument photos

a

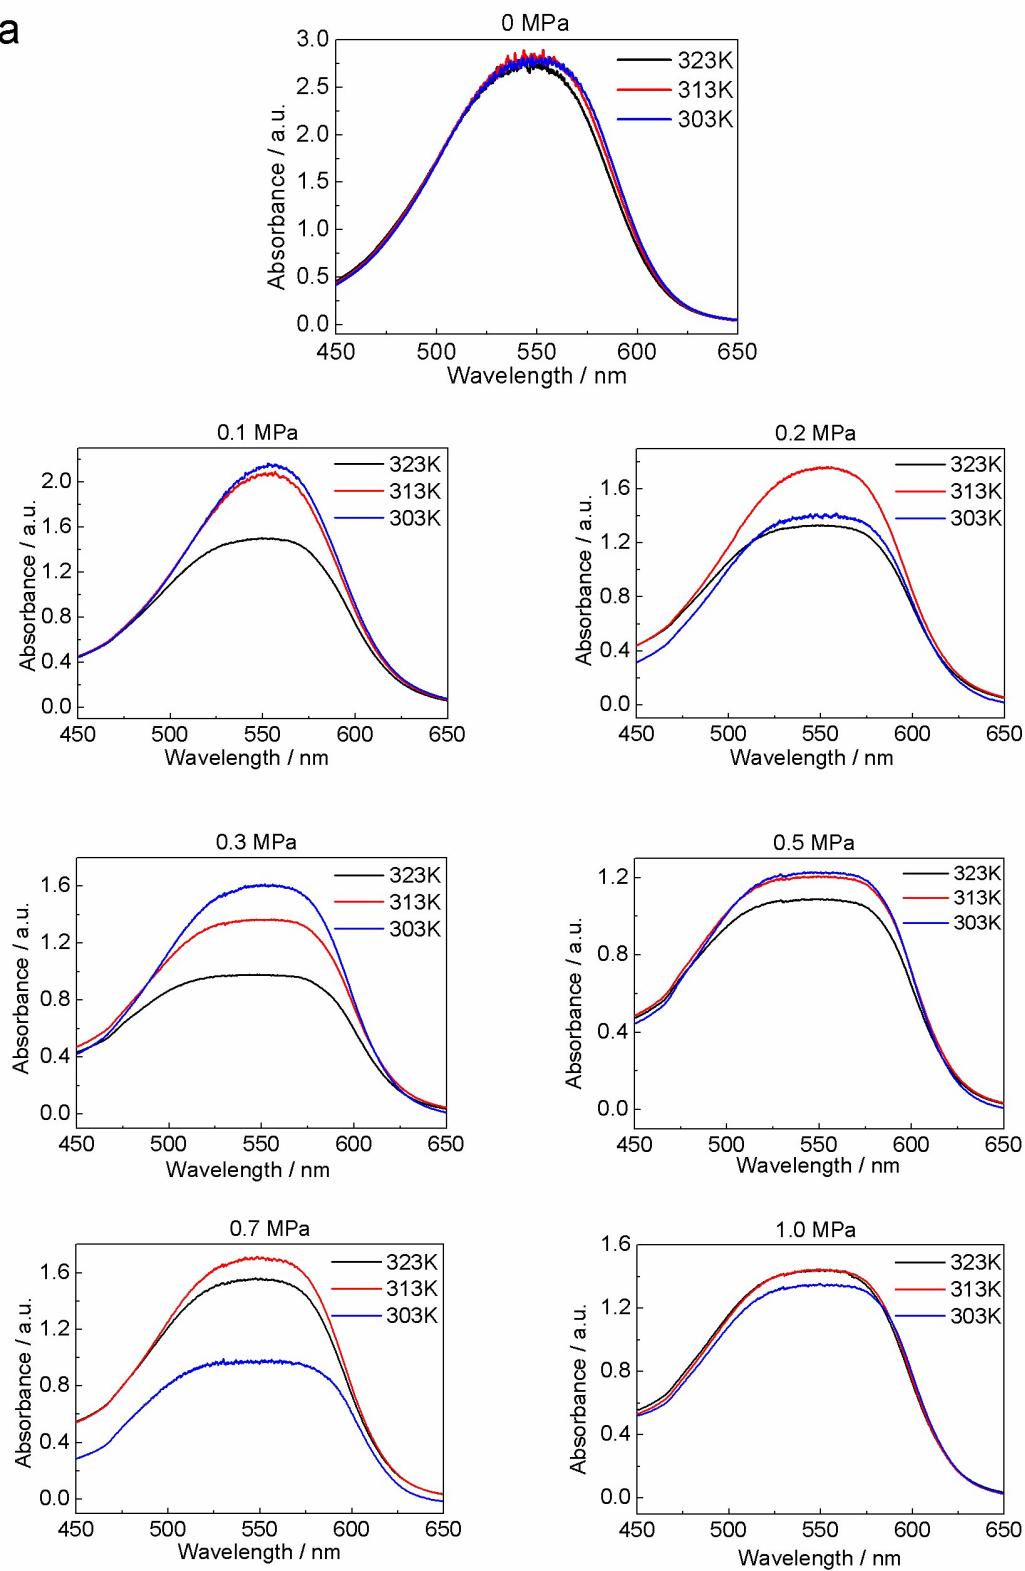

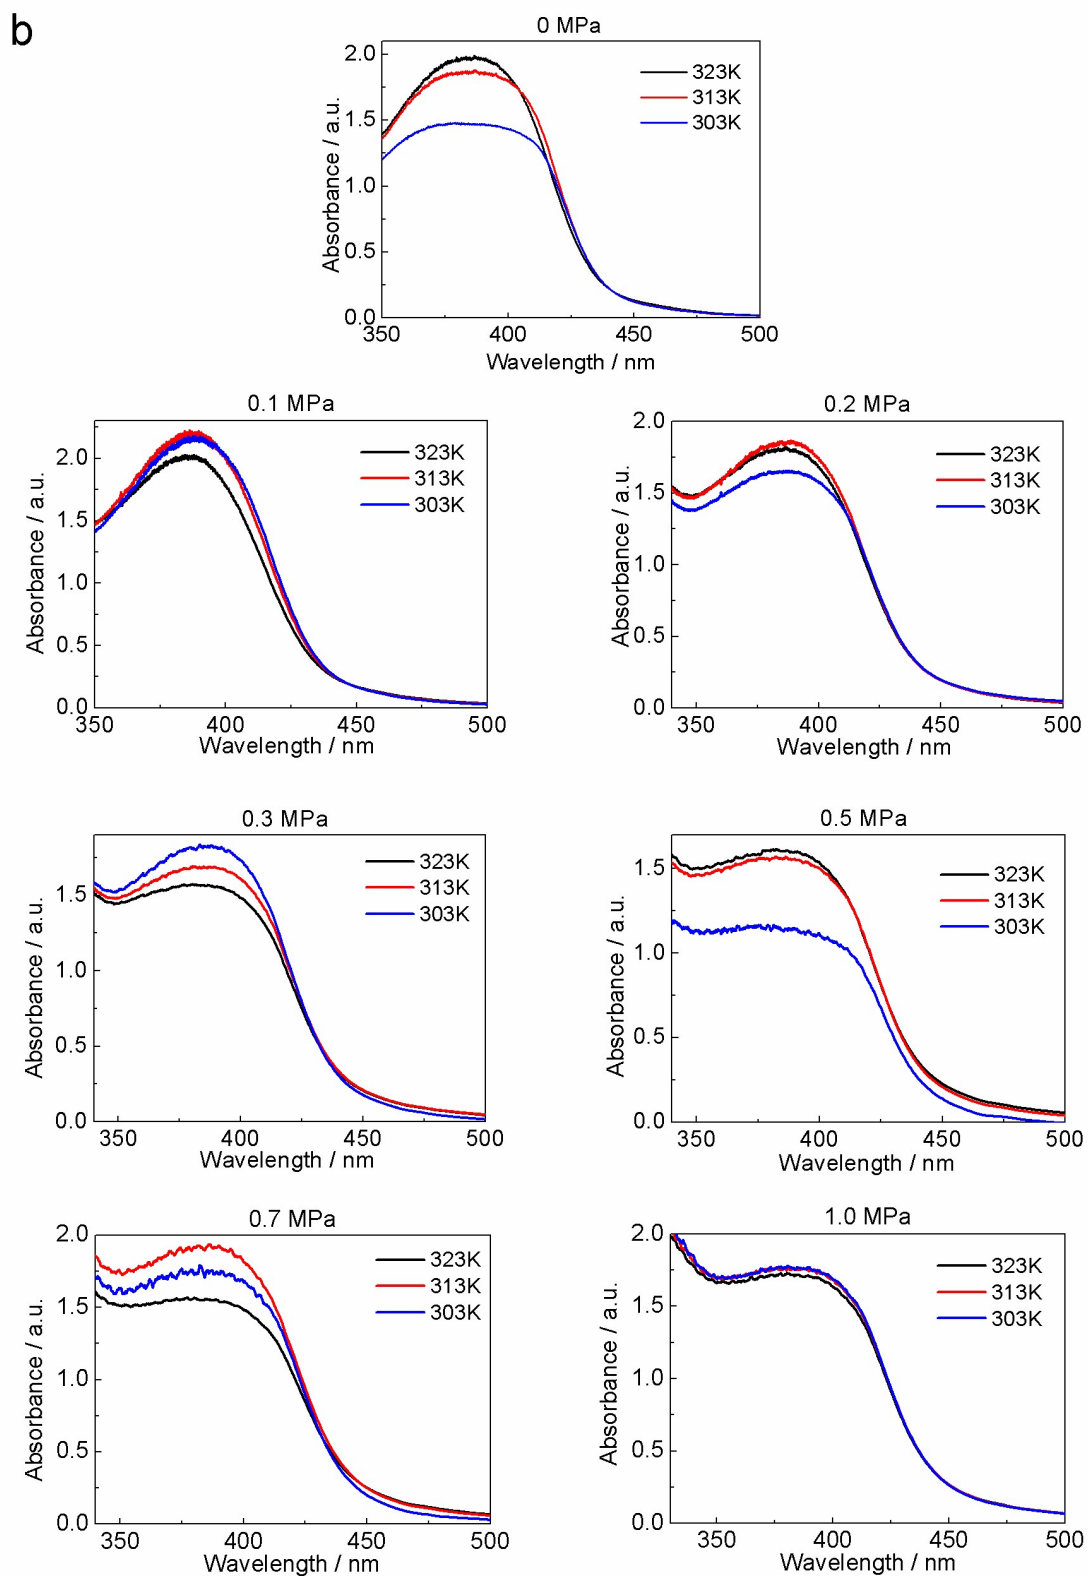

**Fig. S7** UV-Vis spectra of CO<sub>2</sub>-DMSO/DBU solvent system with: (a) Nile red as dye; (b) 4-nitroaniline as dye

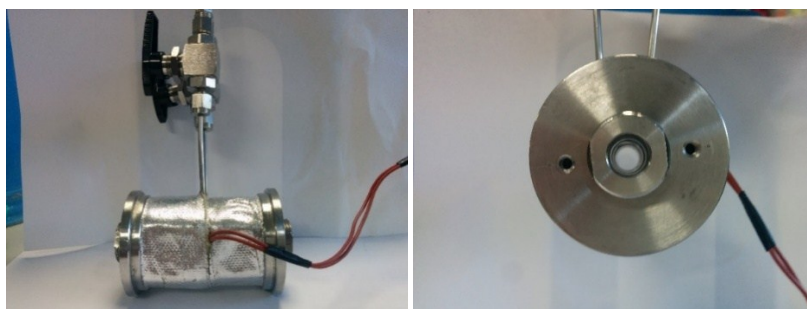

**Fig. S8** The photo of high-pressure UV-Vis instrument for measuring the Kamlet-Taft parameters (instrument length: 9 cm; volume, diameter and length of the cuvette are 2.3 ml, 1.2 cm, 2.0 cm, respectively)

## 7. Electrostatic potential (ESP) results

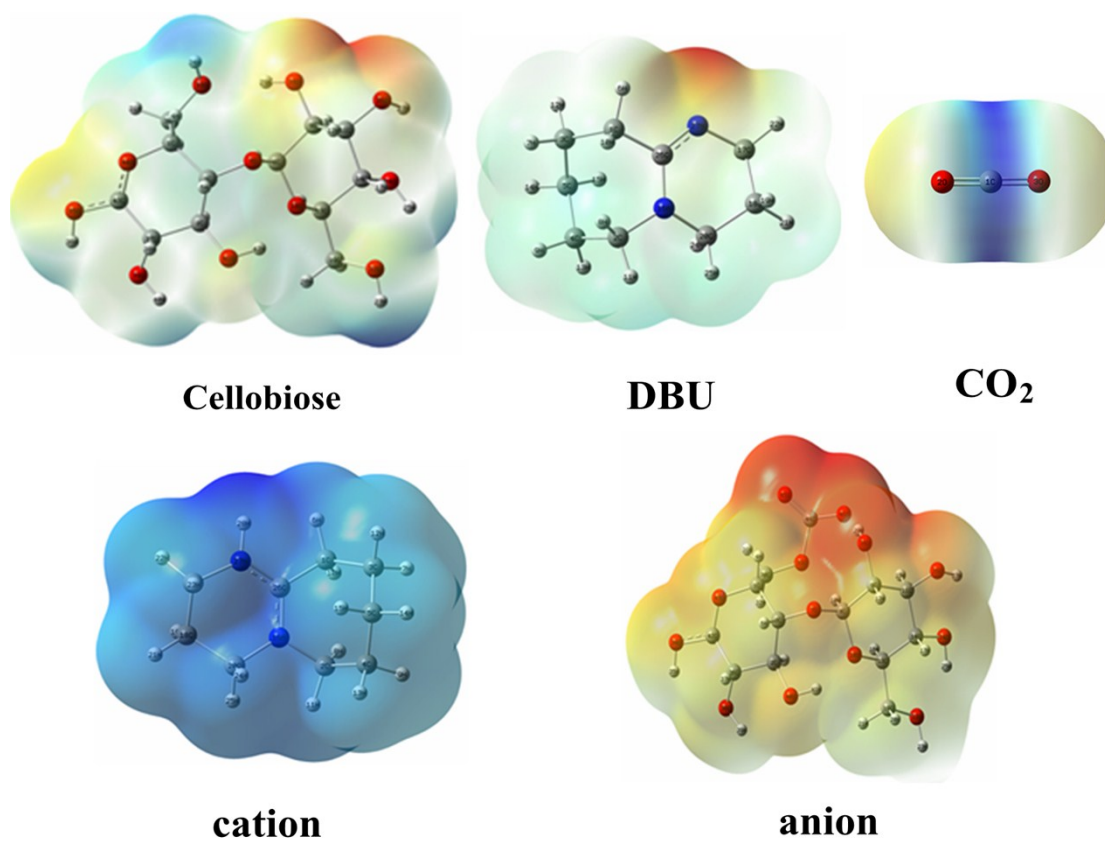

**Fig. S9** Electrostatic potential surface of cellobiose, DBU, CO<sub>2</sub> and ions of product computed at the M062X/6-311++G\*\* level. (The regions with positive electrostatic potential and negative electrostatic potential were depicted by blue and red, respectively.)

## 8. Characterization and analysis of the regenerated cellulose

After precipitation, XRD and TGA measurements were taken for the regenerated cellulose (see in Fig. S10). Fig. S10 (a) shows the XRD diagram of the native and regenerated cellulose. It is obvious that the native cellulose has a better diffraction pattern while regenerated cellulose has a broad peak. The XRD results indicate the cellulose crystalline form changed from I to II, which is consistent with literature results.<sup>2-4</sup> The reason account for the decrystallization of cellulose might be that inter- and intra-molecular hydrogen bonding has been broken partially in the dissolving process. On the other hand, TGA profile shows similar change from cellulose (with only one inflection point) to less stable cellulose (with three inflection point).<sup>4-5</sup>

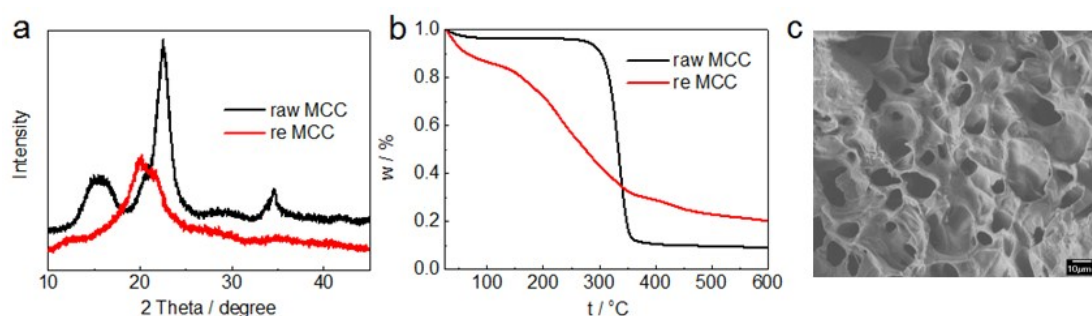

**Fig. S10** Differences of the raw cellulose and regenerate cellulose in (a) XRD spectroscopy; (b) TGA diagram; (c) SEM photo of regenerated cellulose after freeze-drying the cellulose solution.

## 9. Reusability/recyclability of the solvent system

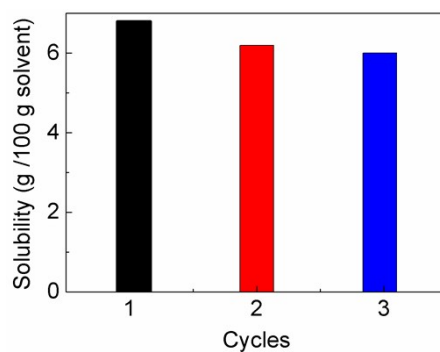

**Fig. S11** Cycle times of the DMSO/DBU (5.1 mole percent of DBU) solvent system

## REFERENCES

1. Heldebrant, D. J.; Yonker, C. R.; Jessop, P. G.; Phan, L., Organic liquid CO<sub>2</sub> capture agents with high gravimetric CO<sub>2</sub> capacity. *Energy Environ. Sci.* **2008**, *1* (4), 487-493.
2. Zhang, L.; Ruan, D.; Zhou, J., Structure and properties of regenerated cellulose films prepared from cotton linters in NaOH/urea aqueous solution. *Ind. Eng. Chem. Res.* **2001**, *40* (25), 5923-5928.
3. Zhang, L.; Ruan, D.; Gao, S., Dissolution and regeneration of cellulose in NaOH/thiourea aqueous solution. *J.*

*Polym. Sci., Part B: Polym. Phys.* **2002**, *40* (14), 1521-1529.

4. Sun, X.; Chi, Y.; Mu, T., Studies on staged precipitation of cellulose from an ionic liquid by compressed carbon dioxide. *Green Chem.* **2014**, *16* (5), 2736-2744.

5. Isogai, A., NMR analysis of cellulose dissolved in aqueous NaOH solutions. *Cellulose* **1997**, *4* (2), 99-107.
